# Supplementary material for: Chloride intracellular channel 1 as a switch among tumor behaviors in human esophageal squamous cell carcinoma
Source: PubMed Central journal article supplement (PMC5955400; doi:10.18632/oncotarget.25296), 2018-05-01
Supplement: oncotarget-09-23237-s001.pdf [file oncotarget-09-23237-s001.pdf]

## Chloride intracellular channel 1 as a switch among tumor behaviors in human esophageal squamous cell carcinoma

### SUPPLEMENTARY MATERIALS

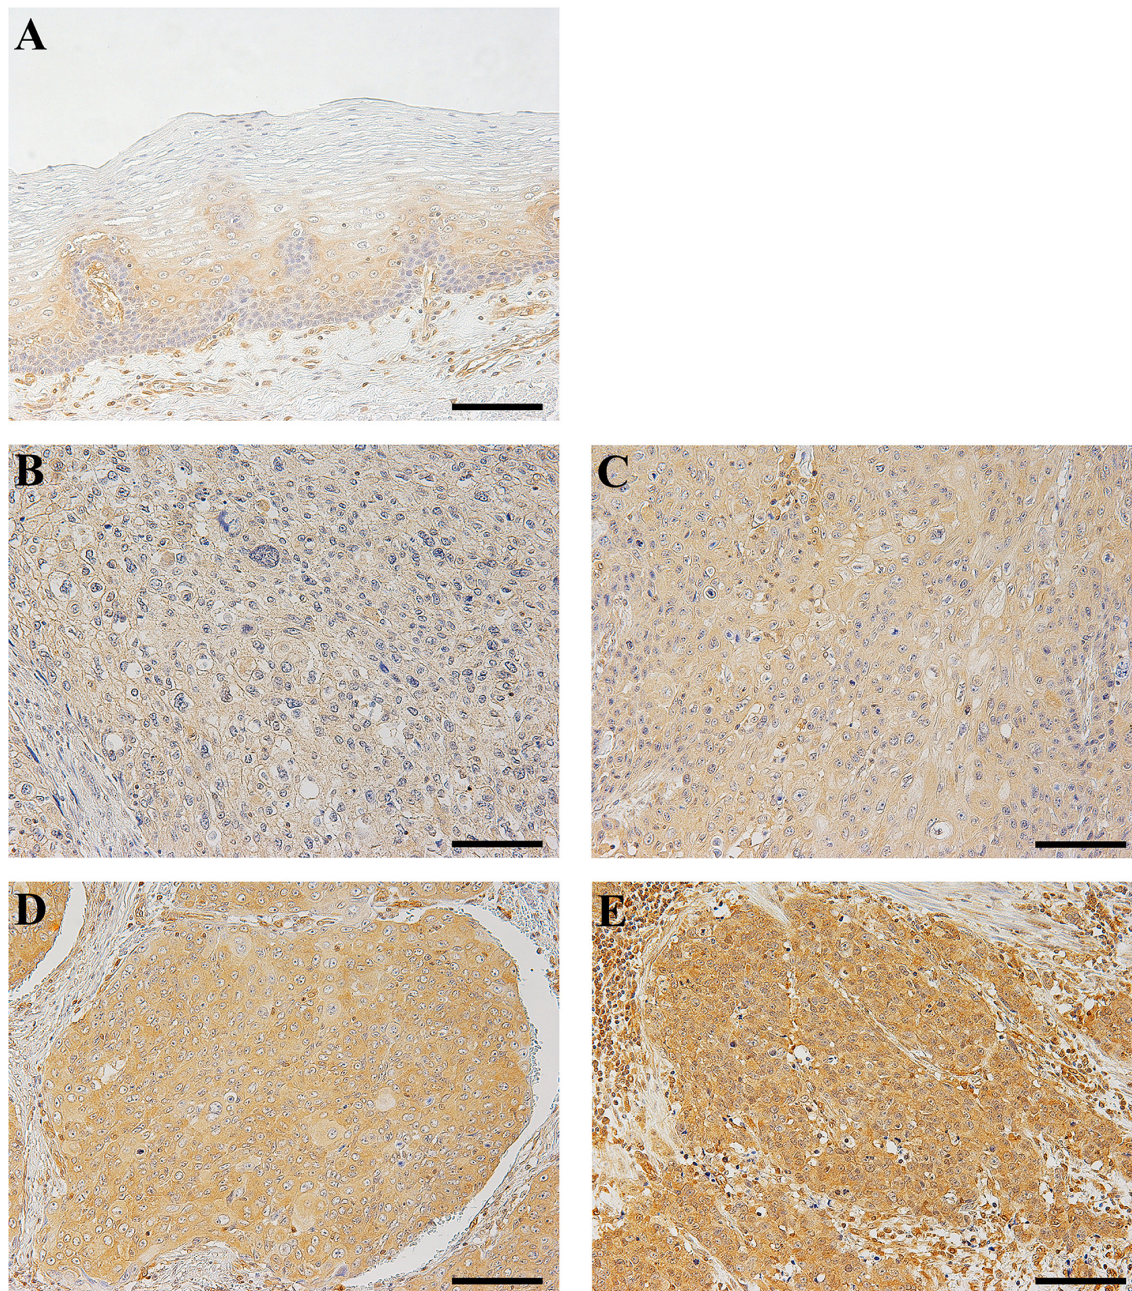

**Supplementary Figure 1: CLIC1 protein expression in human esophageal squamous cell carcinoma (ESCC) using the high-power field.** (A) Immunohistochemical staining of non-cancerous esophageal epithelia with the CLIC1 antibody. Magnification:  $\times 200$ . Bar 100  $\mu\text{m}$ . (B-E) Photomicrographs of CLIC1 immunohistochemistry are shown with examples of an intensity score of 0 (B), 1 (C), 2 (D), and 3 (E). Magnification:  $\times 200$ . Bar 100  $\mu\text{m}$ . In ESCC cells, CLIC1 was mainly expressed in the cytoplasm, but was not specifically expressed in cell membrane.

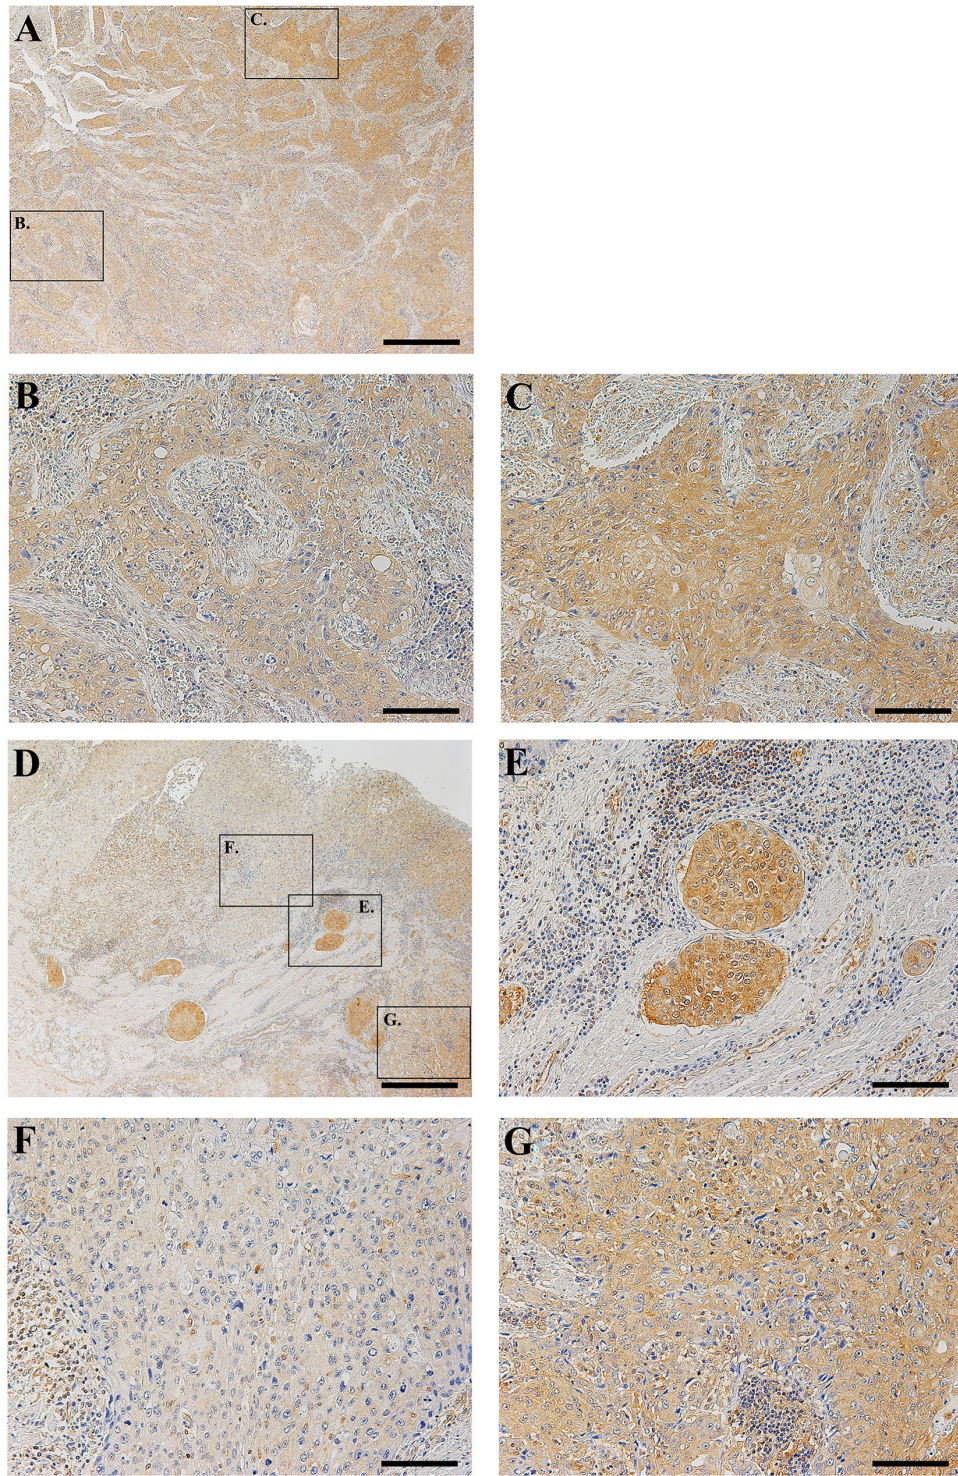

**Supplementary Figure 2: Immunohistochemistry for CLIC1 showed that there was heterogeneity in resected ESCC tissues.** (A) Immunohistochemical staining of one ESCC sample with the CLIC1 antibody. Magnification:  $\times 40$ . Bar 500  $\mu\text{m}$ . (B) The figure using the high-power field (magnification:  $\times 200$ ). Bar 100  $\mu\text{m}$ . This area was weakly staining. (C) The figure using the high-power field (magnification:  $\times 200$ ). Bar 100  $\mu\text{m}$ . This area was moderately staining. (D) Immunohistochemical staining of another ESCC sample with the CLIC1 antibody. Magnification:  $\times 40$ . Bar 500  $\mu\text{m}$ . (E) The figure using the high-power field (magnification:  $\times 200$ ). Bar 100  $\mu\text{m}$ . This area was strongly staining. (F) The figure using the high-power field (magnification:  $\times 200$ ). Bar 100  $\mu\text{m}$ . This area was no staining. (G) The figure using the high-power field (magnification:  $\times 200$ ). Bar 100  $\mu\text{m}$ . This area was moderately staining.

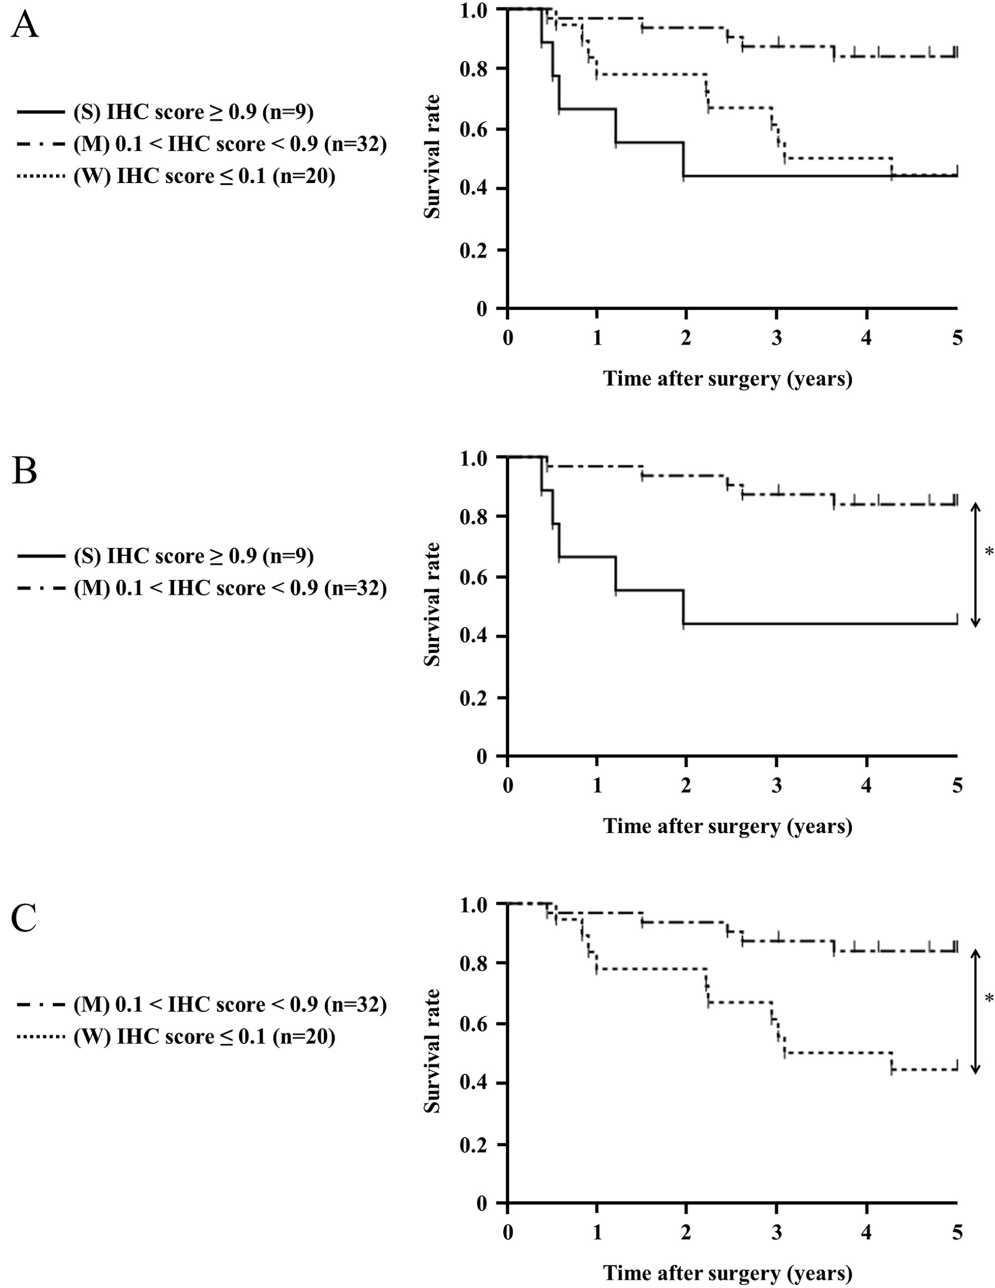

**Supplementary Figure 3: Survival curve of patients after curative resection for ESCC among the three classified groups according to the expression of CLIC1.** All patients were classified into three groups: (S) the very strong CLIC1 expression group, CLIC1 IHC score  $\geq 0.9$  (n=9); (M) the middle CLIC1 expression group,  $0.1 < \text{IHC score} < 0.9$  (n=32); (W) the very weak CLIC1 expression group, CLIC1 IHC score  $\leq 0.1$  (n=20) in the tumor. **(A)** Survival curve of patients after curative resection for ESCC among the three groups. **(B)** Survival curve of patients after curative resection for ESCC between group (S) and group (M). Group (S) was significantly poorer prognosis than group (M). **(C)** Survival curve of patients after curative resection for ESCC between group (M) and group (W). Group (W) was significantly poorer prognosis than group (M). \* $p < 0.01$ : Log-rank test.

**Supplementary Table 1: Top diseases and biological functions of CLIC1 according to an Ingenuity Pathway Analysis**

| <b>Top Diseases and Biological Functions</b> |                     |                            |
|----------------------------------------------|---------------------|----------------------------|
| <b>Diseases and Disorders</b>                |                     |                            |
| <b>Name</b>                                  | <b>P value</b>      | <b>Number of molecules</b> |
| Neurological Disease                         | 2.37E-04 - 7.10E-09 | 500                        |
| Cancer                                       | 2.58E-04 - 2.53E-08 | 2162                       |
| Gastrointestinal Disease                     | 1.93E-04 - 2.53E-08 | 1865                       |
| Hepatic System Disease                       | 7.09E-05 - 2.53E-08 | 998                        |
| Organismal Injury and Abnormalities          | 2.58E-04 - 2.53E-08 | 2198                       |
| <b>Molecular and Cellular Functions</b>      |                     |                            |
| <b>Name</b>                                  | <b>P value</b>      | <b>Number of molecules</b> |
| Cell Morphology                              | 2.37E-04 - 4.21E-14 | 597                        |
| Cellular Growth and Proliferation            | 2.43E-04 - 2.65E-11 | 648                        |
| Cellular Development                         | 2.43E-04 - 2.05E-10 | 707                        |
| Cellular Movement                            | 2.37E-04 - 1.36E-09 | 514                        |
| Cellular Assembly and Organization           | 2.52E-04 - 5.50E-09 | 377                        |
